# Supplementary material
Source: publisher site journal article supplement (https://www.dovepress.com/article/405845)
Supplement: Supplementary file 1 [file get_supplementary_file.php]

**Supplementary Table 1** Changes in therapeutics over 3 years

|  | NL | NL-GT | GT | GT-EM | EM |
| --- | --- | --- | --- | --- | --- |
| Subjects (n) | 19 | 14 | 23 | 20 | 8 |
| **Baseline Treatments** (n) | | | | | |
| None | 6 | 6 | 6 | 5 | 1 |
| Monotherapy  (ICS / LAMA / LABA) | 1 / 7 / 2 | 0 / 2 / 2 | 0 / 9 / 4 | 0 / 4 / 3 | 0 / 1 / 1 |
| Combination (ICS + LABA / LAMA + LABA /  ICS + LAMA) | 2 / 1 / 0 | 1 / 2 / 0 | 1 / 1 / 0 | 1 / 5 / 0 | 0 / 2 / 0 |
| Triple (LAMA + LABA + ICS) | 0 | 1 | 2 | 2 | 3 |
| **Treatments after 3 years** (n) | | | | | |
| None | 4 | 3 | 4 | 1 | 0 |
| Monotherapy  (ICS / LAMA / LABA) | 0 / 5 / 3 | 0 / 3 / 3 | 0 / 6 / 5 | 0 / 5 / 1 | 0 / 2/ 0 |
| Combination (ICS + LABA / LAMA + LABA /  ICS + LAMA) | 3 / 2 / 1 | 2 / 1 / 1 | 3 / 3 / 0 | 1 / 8 / 0 | 0 / 2 / 0 |
| Triple (LAMA + LABA + ICS) | 1 | 1 | 2 | 4 | 4 |

**Abbreviations:** ICS, inhaled corticosteroid; LABA, long-acting β2 agonist; LAMA, long-acting muscarinic antagonist
